# Supplementary material for: Prolonged and Substantial Discordance in Prevalence of Raltegravir-Resistant HIV-1 in Plasma versus PBMC Samples Revealed by 454 “Deep” Sequencing
Source: PubMed Central journal article supplement (PMC3458959; doi:10.1371/journal.pone.0046181), 2012-09-26

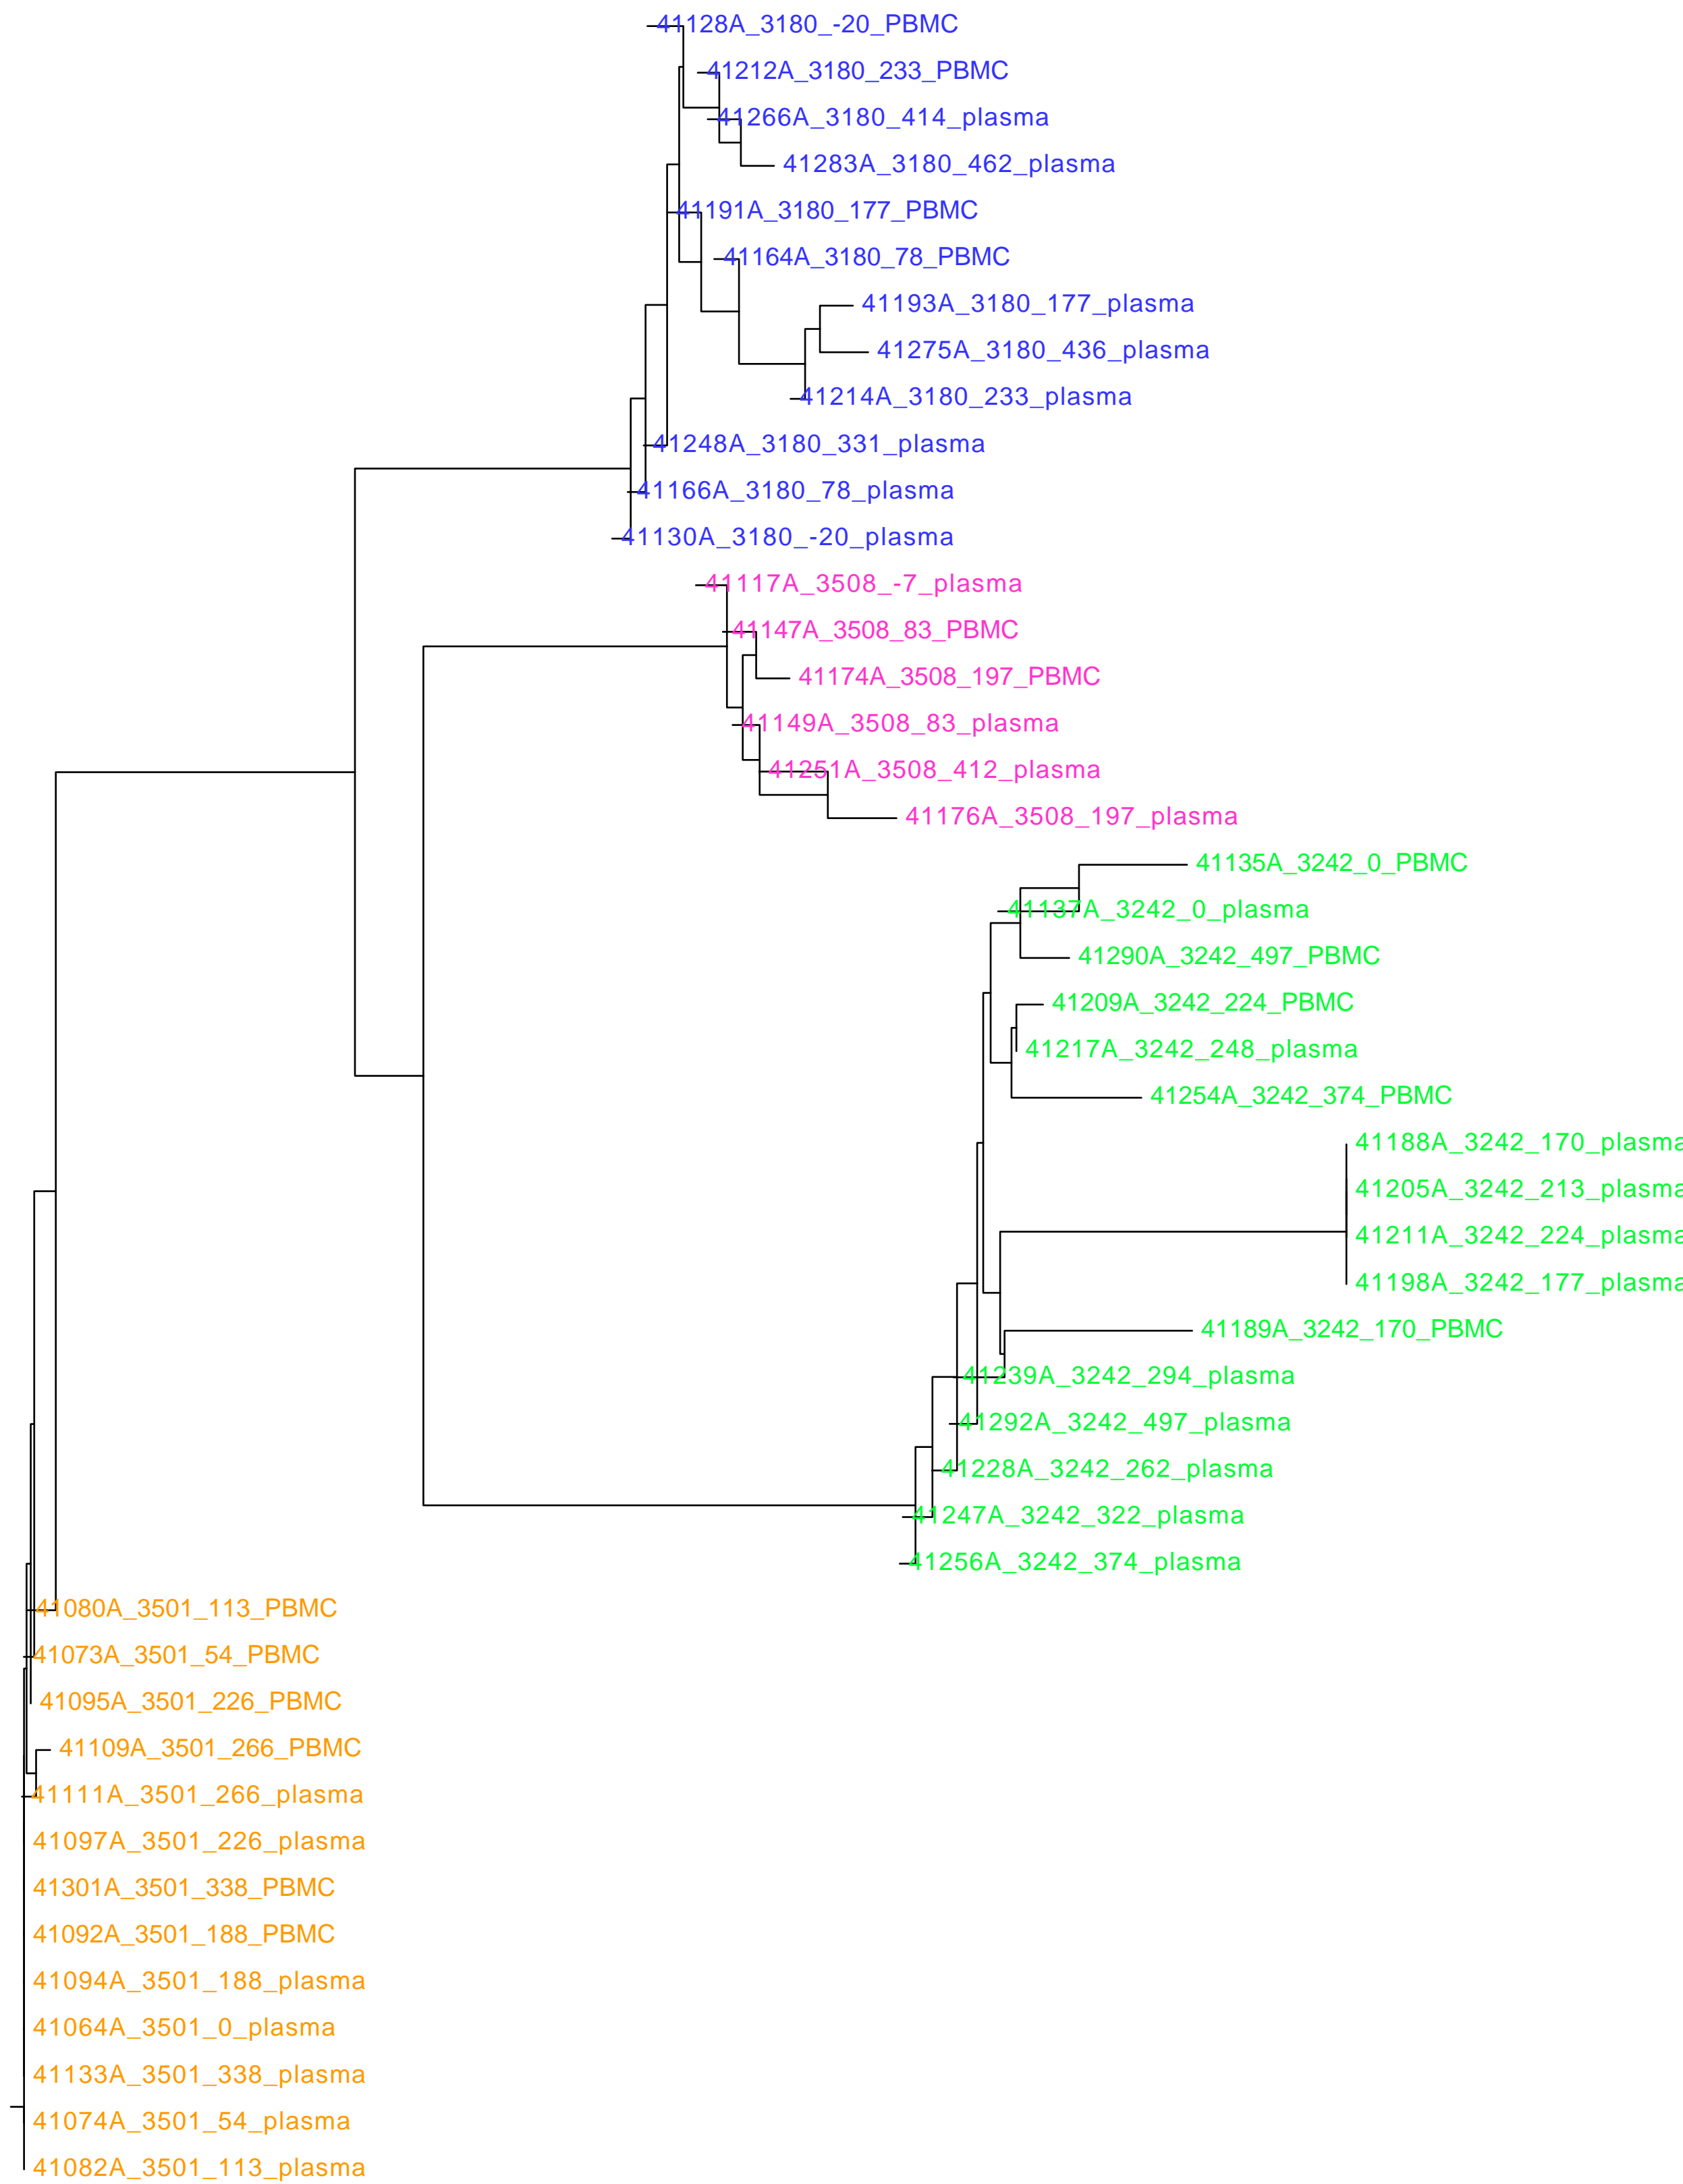

Supplement: pone.0046181.s001.pdf [file pone.0046181.s001.pdf]
