# Supplementary material for: Prolonged and Substantial Discordance in Prevalence of Raltegravir-Resistant HIV-1 in Plasma versus PBMC Samples Revealed by 454 “Deep” Sequencing
Source: PLoS One. 2012 Sep 26;7(9):e46181. doi: 10.1371/journal.pone.0046181 (PMC3458959; doi:10.1371/journal.pone.0046181)
Supplement: Table S5 — Protease/reverse transcriptase (PRRT) resistance mutations by Sanger sequencing. (XLS) [file pone.0046181.s008.xls]

## Sheet: ALL
Table S5. Protease/reverse transcriptase (PRRT) resistance mutations by Sanger sequencing
	Subject 3180: Major PRRT resistance mutations relevant to the subject's regimen:
(a)	Major PI-, NRTI- and NNRTI-associated resistance mutations
					PI resistance								NRTI resistance										NNRTI resistance
					I47		I50		I54		I84		K65		K70		L74		Y115		M184		L100		K101		Y181
	Days Post Therapy	Log Viral Load	CD4	Regimen	Plasma	PBMC	Plasma	PBMC	Plasma	PBMC	Plasma	PBMC	Plasma	PBMC	Plasma	PBMC	Plasma	PBMC	Plasma	PBMC	Plasma	PBMC	Plasma	PBMC	Plasma	PBMC	Plasma	PBMC
	-20	6.0861	5	None	I	I	I	I	I	I	I	I	K	K	R	R	L	L	Y	Y	M	M	L	L	K	K	Y	Y
	78	3.53352	16	ABC,3TC,ETV,RGV	I	I	I	I	I	I/V	I	I	K	K	R	K/R	L	L/V	Y	Y	M	M/V	L	I/L	K	K	Y	Y
	177	4.40362	18	ABC,3TC,ETV,RGV	I	I	I	I	V	I/V	V	I/V	K	K	K	K/R	V	L/V	Y	Y	V	M/V	I	I/L	K	K	Y	Y
	233	4.27446	13	None	I	I	I	I	I/V	I/V	V	I/M/V	K	K	K	K/R	V	L/V	Y	Y	V	M/V	I	I/L	K	K	Y	Y
	331	4.1051	12	ABC,3TC,ETV,RGV	I	*	I	*	I	*	I	*	K	*	R	*	L	*	Y	*	M	*	L	*	K	*	Y	*
	414	*	59	FTC/TDF,ETV,RTV,DRV	*	*	*	*	*	*	*	*	*	*	*	*	*	*	*	*	*	*	*	*	*	*	*	*
	436	*	54	FTC/TDF,ETV,RTV,DRV	I	*	I	*	V	*	I	*	K	*	R	*	L	*	Y	*	M	*	I	*	K	*	Y	*
	462	2.42488	62	FTC/TDF,ETV,RTV,DRV	I	*	I	*	I	*	I	*	K	*	R	*	L	*	Y	*	M	*	L	*	K	*	Y	*
(b)	69 insertion complex and TAMs
					M41		A62		D67		T69		K70		L210		T215		K219
	Days Post Therapy	Log Viral Load	CD4	Regimen	Plasma	PBMC	Plasma	PBMC	Plasma	PBMC	Plasma	PBMC	Plasma	PBMC	Plasma	PBMC	Plasma	PBMC	Plasma	PBMC
	-20	6.0861	5	None	L	L	A	A	D	D	T	T	R	R	W	W	D	D	K	K
	78	3.53352	16	ABC,3TC,ETV,RGV	L	L	A	A	D	D/N	T	T	R	K/R	W	W	D	D/Y	K	K/Q
	177	4.40362	18	ABC,3TC,ETV,RGV	L	L	A	A	N	D/N	N/T	T	K	K/R	W	W	Y	D/Y	Q	K/Q
	233	4.27446	13	None	L	L	A	A	N	D/N	N/T	N/T	K	K/R	W	W	Y	D/Y	Q	K/Q
	331	4.1051	12	ABC,3TC,ETV,RGV	L	*	A	*	D	*	T	*	R	*	W	*	D	*	K	*
	414	*	59	FTC/TDF,ETV,RTV,DRV	*	*	*	*	*	*	*	*	*	*	*	*	*	*	*	*
	436	*	54	FTC/TDF,ETV,RTV,DRV	L	*	A	*	N	*	T	*	R	*	W	*	D	*	Q	*
	462	2.42488	62	FTC/TDF,ETV,RTV,DRV	L	*	A	*	D	*	T	*	R	*	W	*	D	*	K	*
(c)	151 complex
					A62		V75		F77		F116		Q151
	Days Post Therapy	Log Viral Load	CD4	Regimen	Plasma	PBMC	Plasma	PBMC	Plasma	PBMC	Plasma	PBMC	Plasma	PBMC
	-20	6.0861	5	None	A	A	V	V	F	F	F	F	Q	Q
	78	3.53352	16	ABC,3TC,ETV,RGV	A	A	V	I/M/V	F	F	F	F	Q	Q
	177	4.40362	18	ABC,3TC,ETV,RGV	A	A	M	I/M/V	F	F	F	F	Q	Q
	233	4.27446	13	None	A	A	M	I/M/V	F	F	F	F	Q	Q
	331	4.1051	12	ABC,3TC,ETV,RGV	A	*	V	*	F	*	F	*	Q	*
	414	*	59	FTC/TDF,ETV,RTV,DRV	*	*	*	*	*	*	*	*	*	*
	436	*	54	FTC/TDF,ETV,RTV,DRV	A	*	M	*	F	*	F	*	Q	*
	462	2.42488	62	FTC/TDF,ETV,RTV,DRV	A	*	V	*	F	*	F	*	Q	*
	Subject 3242: Major PRRT resistance mutations relavant to the subject's regimen:
(a)	Major PI- and NRTI-associated resistance mutations
					PI resistance								NRTI resistance
					I47		I50		I54		I84		K65		K70		M184
	Days Post Therapy	Log viral load	CD4	Regimen	Plasma	PBMC	Plasma	PBMC	Plasma	PBMC	Plasma	PBMC	Plasma	PBMC	Plasma	PBMC	Plasma	PBMC
	0	4.07317	331	FTC/TDF,RTV,DRV,ENF	V	V	I	I	L	L	V	V	K	K	R	R	V	V
	170	3.92007	507	FTC/TDF,RTV,DRV,RGV,MVR	V	V	I	I	L	L	V	V	K	K	R	R	V	V
	177	3.98717	432	FTC/TDF,RTV,DRV,RGV	V	*	I	*	L	*	V	*	K	*	R	*	V	*
	213	3.54704	509	FTC/TDF,RTV,DRV,RGV	V	*	I	*	L	*	V	*	K	*	R	*	V	*
	224	3.9997	470	FTC/TDF,RTV,DRV	V	*	I	*	L	*	V	*	K	*	R	*	V	*
	248	4.94366	462	FTC/TDF,RTV,DRV	V	*	I	*	L	*	V	*	K	*	R	*	V	*
	262	4.94044	522	FTC/TDF,RTV,DRV	V	*	I	*	L	*	V	*	K	*	R	*	V	*
	294	4.43351	456	FTC/TDF,RTV,DRV	V	V	I	I	L	L	V	V	K	K	R	R	V	V
	322	4.59507	540	FTC/TDF,RTV,DRV	V	*	I	*	L	*	V	*	K	*	R	*	V	*
	374	4.75233	452	FTC/TDF,RTV,DRV	V	V	I	I	L	L	V	V	K	K	R	R	V	V
	497	3.80699	447	*	V	V	I	I	L	L	V	V	K	K	R	R	V	V
(b)	69 insertion complex and TAMs
					M41		A62		D67		T69		K70		L210		T215		K219
	Days Post Therapy	Log viral load	CD4	Regimen	Plasma	PBMC	Plasma	PBMC	Plasma	PBMC	Plasma	PBMC	Plasma	PBMC	Plasma	PBMC	Plasma	PBMC	Plasma	PBMC
	0	4.07317	331	FTC/TDF,RTV,DRV,ENF	M	M	A	A	N	N	T	T	R	R	L	L	Y	Y	E	E
	170	3.92007	507	FTC/TDF,RTV,DRV,RGV,MVR	M	M	A	A	N	N	N	N	R	R	L	L	Y	Y	E	E
	177	3.98717	432	FTC/TDF,RTV,DRV,RGV	M	*	A	*	N	*	N	*	R	*	L	*	Y	*	E	*
	213	3.54704	509	FTC/TDF,RTV,DRV,RGV	M	*	A	*	N	*	N	*	R	*	L	*	Y	*	E	*
	224	3.9997	470	FTC/TDF,RTV,DRV	M	*	A	*	N	*	N	*	R	*	L	*	Y	*	E	*
	248	4.94366	462	FTC/TDF,RTV,DRV	M	*	A	*	N/S	*	N	*	R	*	L	*	Y	*	E	*
	262	4.94044	522	FTC/TDF,RTV,DRV	M	*	A	*	N	*	N/T	*	R	*	L	*	Y	*	E	*
	294	4.43351	456	FTC/TDF,RTV,DRV	M	M	A	A	N	N	N	N	R	R	L	L	Y	Y	E	E
	322	4.59507	540	FTC/TDF,RTV,DRV	M	*	A	*	N	*	N	*	R	*	L	*	Y	*	E	*
	374	4.75233	452	FTC/TDF,RTV,DRV	M	M	A	A	N	N	N	N	R	R	L	L	Y	Y	E	E
	497	3.80699	447	*	M	M	A	A	N	N	N	N	R	R	L	L	Y	Y	E	E
(c)	151 complex
					A62		V75		F77		F116		Q151
	Days Post Therapy	Log viral load	CD4	Regimen	Plasma	PBMC	Plasma	PBMC	Plasma	PBMC	Plasma	PBMC	Plasma	PBMC
	0	4.07317	331	FTC/TDF,RTV,DRV,ENF	A	A	V	V	F	F	F	F	Q	Q
	170	3.92007	507	FTC/TDF,RTV,DRV,RGV,MVR	A	A	V	V	F	F	F	F	Q	Q
	177	3.98717	432	FTC/TDF,RTV,DRV,RGV	A	*	V	*	F	*	F	*	Q	*
	213	3.54704	509	FTC/TDF,RTV,DRV,RGV	A	*	V	*	F	*	F	*	Q	*
	224	3.9997	470	FTC/TDF,RTV,DRV	A	*	V	*	F	*	F	*	Q	*
	248	4.94366	462	FTC/TDF,RTV,DRV	A	*	V	*	F	*	F	*	Q	*
	262	4.94044	522	FTC/TDF,RTV,DRV	A	*	V	*	F	*	F	*	Q	*
	294	4.43351	456	FTC/TDF,RTV,DRV	A	A	V	V	F	F	F	F	Q	Q
	322	4.59507	540	FTC/TDF,RTV,DRV	A	*	V	*	F	*	F	*	Q	*
	374	4.75233	452	FTC/TDF,RTV,DRV	A	A	V	V	F	F	F	F	Q	Q
	497	3.80699	447	*	A	A	V	V	F	F	F	F	Q	Q
	Subject 3501: Major PRRT resistance mutations relavant to the subject's regimen:
(a)	Major PI- and NRTI-associated resistance mutations
					PI resistance																NRTI resistance
					V32		I47		I50		I54		Q58		T74		V82		I84		K65		K70		L74		Y115		M184
	Days Post Therapy	Log viral load	CD4	Regimen	Plasma	PBMC	Plasma	PBMC	Plasma	PBMC	Plasma	PBMC	Plasma	PBMC	Plasma	PBMC	Plasma	PBMC	Plasma	PBMC	Plasma	PBMC	Plasma	PBMC	Plasma	PBMC	Plasma	PBMC	Plasma	PBMC
	0	5.26951	3	TDF,ABC/3TC,LPV/r,ENF	I	*	V	*	I	*	L	*	E	*	T	*	A	*	I	*	K	*	K	*	V	*	Y	*	V	*
	54	5.2833	10	*	I	I/V	V	V	I	I	L	L/V	E	E	T	T	A	A	I/V	I	K	K	K	K	V	V	Y	Y	V	M/V
	113	5.3927	18	TDF,ABC/3TC,RTV,TPV,S-RGVVO	I	I/V	V	V	I	I	L	L/V	E	E	A/T	P/T	A	A	I/V	I/V	K	K	K	K	V	V	Y	Y	V	M/V
	188	*	19	TDF,ABC/3TC,RTV,TPV,RGV	I	I/V	V	V	I	I	L	L/V	E	E	A/T	T	A/T	A	I/V	I/V	K	K	K	K	V	V	Y	Y	V	M/V
	226	5.68124	14	TDF,ABC/3TC,RTV,TPV,RGV	I	I/V	V	V	I	I	L	L/V	E	E	A/T	A/T	A/T	A	I/V	I/V	K	K	K	K	V	V	Y	Y	V	M/V
	266	*	17	TDF,ABC/3TC,ETV,RTV,DRV,RGV,PRED	I/V	I/V	V	V	I	I	L/V	L/V	E	E	A/T	A/T	A	A	I/V	I/V	K	K	K	K	V	V	Y	Y	V	V
	338	4.58546	30	TDF,ABC/3TC,ETV,RTV,DRV,RGV	I	I/V	V	V	I	I	L	L/V	E	E	A	A/T	A	A	V	I/V	K	K	K	K	I/V	V	Y	Y	V	M/V
(b)	69 insertion complex and TAMs
					M41		A62		D67		T69		K70		L210		T215		K219
	Days Post Therapy	Log viral load	CD4	Regimen	Plasma	PBMC	Plasma	PBMC	Plasma	PBMC	Plasma	PBMC	Plasma	PBMC	Plasma	PBMC	Plasma	PBMC	Plasma	PBMC
	0	5.26951	3	TDF,ABC/3TC,LPV/r,ENF	L	*	A	*	N	*	D	*	K	*	W	*	Y	*	K	*
	54	5.2833	10	*	L	L	A	A	N	N	D	D	K	K	W	W	Y	Y	K/R	K/R
	113	5.3927	18	TDF,ABC/3TC,RTV,TPV,S-RGVVO	L	L	A	A	N	N	D	D	K	K	W	W	Y	Y	K/R	K/R
	188	*	19	TDF,ABC/3TC,RTV,TPV,RGV	L	L	A	A	N	N	D	D	K	K	W	W	Y	Y	K/R	K/R
	226	5.68124	14	TDF,ABC/3TC,RTV,TPV,RGV	L	L	A	A	N	N	D	D	K	K	W	W	Y	Y	K/R	K/R
	266	*	17	TDF,ABC/3TC,ETV,RTV,DRV,RGV,PRED	L	L	A	A	N	N	D	D	K	K	W	W	Y	Y	K/R	K/R
	338	4.58546	30	TDF,ABC/3TC,ETV,RTV,DRV,RGV	L	L	A	A	N	N	D	D	K	K	W	W	Y	Y	E/G/K/R	K/R
(c)	151 complex
					A62		V75		F77		F116		Q151
	Days Post Therapy	Log viral load	CD4	Regimen	Plasma	PBMC	Plasma	PBMC	Plasma	PBMC	Plasma	PBMC	Plasma	PBMC
	0	5.26951	3	TDF,ABC/3TC,LPV/r,ENF	A	*	V	*	F	*	F	*	Q	*
	54	5.2833	10	*	A	A	V	V	F	F	F	F	Q	Q
	113	5.3927	18	TDF,ABC/3TC,RTV,TPV,S-RGVVO	A	A	V	V	F	F	F	F	Q	Q
	188	*	19	TDF,ABC/3TC,RTV,TPV,RGV	A	A	V	V	F	F	F	F	Q	Q
	226	5.68124	14	TDF,ABC/3TC,RTV,TPV,RGV	A	A	V	V	F	F	F	F	Q	Q
	266	*	17	TDF,ABC/3TC,ETV,RTV,DRV,RGV,PRED	A	A	V	V	F	F	F	F	Q	Q
	338	4.58546	30	TDF,ABC/3TC,ETV,RTV,DRV,RGV	A	A	V	V	F	F	F	F	Q	Q
	Subject 3508: Major PRRT resistance mutations relavant to the subject's regimen:
(a)	Major PI- and NRTI-associated resistance mutations
					PI resistance								NRTI resistance
					I47		I50		I54		I84		K65		K70		L74		Y115		M184
	Days Post Therapy	Log viral load	CD4	Regimen	Plasma	PBMC	Plasma	PBMC	Plasma	PBMC	Plasma	PBMC	Plasma	PBMC	Plasma	PBMC	Plasma	PBMC	Plasma	PBMC	Plasma	PBMC
	-7	4.63437	3	DDI,3TC,TDF,RTV,DRV,ENF,HGH	I/V	*	I	*	L	*	V	*	K	*	K	*	L	*	Y	*	V	*
	83	4.53154	25	FTC/TDF,RTV,DRV,RGV,MVR,HGH	I	I	I	I	L	V	V	V	K	K	K	K	L	L	Y	Y	V	V
	197	4.69183	7	FTC/TDF,RTV,DRV,RGV,MVR,HGH,FLC	I/V	I/V	I	I	L	V	V	V	K	K	K	K	L	L	Y	Y	V	V
	412	4.57113	4	ABC/3TC,RTV,DRV,RGV	I/V	*	I	*	L	*	V	*	K	*	K	*	L	*	Y	*	V	*
(b)	69 insertion complex and TAMs
					M41		A62		D67		T69		K70		L210		T215		K219
	Days Post Therapy	Log viral load	CD4	Regimen	Plasma	PBMC	Plasma	PBMC	Plasma	PBMC	Plasma	PBMC	Plasma	PBMC	Plasma	PBMC	Plasma	PBMC	Plasma	PBMC
	-7	4.63437	3	DDI,3TC,TDF,RTV,DRV,ENF,HGH	L	*	A	*	N	*	T	*	K	*	W	*	Y	*	E	*
	83	4.53154	25	FTC/TDF,RTV,DRV,RGV,MVR,HGH	L	L	A	A	N	N	T	T	K	K	W	W	Y	Y	E	E
	197	4.69183	7	FTC/TDF,RTV,DRV,RGV,MVR,HGH,FLC	L	L	A	A	N	N	T	T	K	K	W	W	Y	Y	E	E
	412	4.57113	4	ABC/3TC,RTV,DRV,RGV	L	*	A	*	N	*	T	*	K	*	W	*	Y	*	E	*
(c)	151 complex
					A62		V75		F77		F116		Q151
	Days Post Therapy	Log viral load	CD4	Regimen	Plasma	PBMC	Plasma	PBMC	Plasma	PBMC	Plasma	PBMC	Plasma	PBMC
	-7	4.63437	3	DDI,3TC,TDF,RTV,DRV,ENF,HGH	A	*	M	*	F	*	F	*	Q	*
	83	4.53154	25	FTC/TDF,RTV,DRV,RGV,MVR,HGH	A	A	M	M	F	F	F	F	Q	Q
	197	4.69183	7	FTC/TDF,RTV,DRV,RGV,MVR,HGH,FLC	A	A	M	M	F	F	F	F	Q	Q
	412	4.57113	4	ABC/3TC,RTV,DRV,RGV	A	*	M	*	F	*	F	*	Q	*

## Sheet: Key to Abbreviations
Key to Abbreviations of antiretrovirals used in Table S5
ABC	Abacavir
FTC	Emtricitabine
TDF	Tenofovir
3TC	Lamivudine
DDI	Didanosine
ETV	Etravirine
RGV	Raltegravir
RTV	Ritonavir
DRV	Darunavir
LPV/r	Lopinavir/ritonavir
TPV	Tipranavir
ENF	Enfuvirtide (T-20)
MVR	Maraviroc
PRRT	Protease and reverse transcriptase
PI	Protease Inhibitor
NRTI	Nucleosid/Nucleotide Reverse Transcriptase Inhibitor
NNRTI	Non-Nucleoside Reverse Transcriptase Inhibitor
*	Sample or information not available
